# Supplementary material
Source: MDPI journal article supplement (https://www.mdpi.com/1996-1073/16/10/4232)
Supplement: s1 [file s1]

# Capacity Degradation and Aging Mechanisms Evolution of Lithium-Ion Batteries under Different Operation Conditions

Guoqing Luo <sup>1</sup>, Yongzhi Zhang <sup>1,\*</sup> and Aihua Tang <sup>2,\*</sup>

<sup>1</sup> College of Mechanical and Vehicle Engineering, Chongqing University, Chongqing 400044, China; guoqingluohub@gmail.com

<sup>2</sup> School of Vehicle Engineering, Chongqing University of Technology, Chongqing 400054, China

\* Correspondence: yzzhangbit@gmail.com (Y.Z.); aihuatang@cqut.edu.cn (A.T.)

**Abstract:** Since lithium-ion batteries are rarely utilized in their full state-of-charge (SOC) range (0%–100%) in practice, understanding their performance degradation with different SOC swing ranges is critical for optimizing battery usage. We modeled battery aging under different depths of discharge (DODs), SOC swing ranges and temperatures by coupling four aging mechanisms, including the solid–electrolyte interface (SEI) layer growth, lithium (Li) plating, particle cracking, and loss of active material (LAM) with a P2D model. Additionally, the mechanisms causing the accelerated capacity to drop near the battery’s end of life (EOL) were investigated systematically. The results indicate that when the battery operated with a high SOC range, its capacity was more prone to accelerated degradation near the EOL. Among the four degradation mechanisms, Li plating was mainly sensitive to the operation temperature and SOC swing ranges, while SEI growth was mainly sensitive to temperature. Furthermore, there is an inhibitory interaction between Li plating and SEI growth, as well as positive feedback between LAM and particle cracking during battery aging. Additionally, we discovered that the extremely low local porosity around the anode separator could cause the ‘knee point’ of capacity degradation.

**Keywords:** battery aging modeling; aging mechanisms evolution; capacity degradation; aging mechanisms interaction

**Citation:** Luo, G.; Zhang, Y.; Tang, A. Capacity Degradation and Aging Mechanisms Evolution of Lithium-Ion Batteries under Different Operation Conditions. *Energies* **2023**, *16*, 4232. <https://doi.org/10.3390/en16104232>

Academic Editor: Carlos Miguel Costa

Received: 25 April 2023

Revised: 11 May 2023

Accepted: 19 May 2023

Published: 21 May 2023

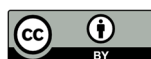

**Copyright:** © 2023 by the authors. Licensee MDPI, Basel, Switzerland. This article is an open access article distributed under the terms and conditions of the Creative Commons Attribution (CC BY) license (<https://creativecommons.org/licenses/by/4.0/>).

**Table S1.** Default degradation parameters.

| Symbol          | Definition                                                                     | Negative electrode (−) | Positive electrode (+) |
|-----------------|--------------------------------------------------------------------------------|------------------------|------------------------|
| $A$             | Total planar electrode area, m <sup>2</sup>                                    | 0.1027                 | 0.1027                 |
| $a_{\pm}$       | Surface area to volume ratio, m <sup>−1</sup>                                  | $3.84 \times 10^5$     | $3.82 \times 10^5$     |
| $c_{m\pm}$      | Maximum Li <sup>+</sup> concentration, mol·m <sup>−3</sup>                     | 33133                  | 63104                  |
| $c_{0\pm}$      | Initial Li <sup>+</sup> concentration, mol m <sup>−3</sup>                     | 29866                  | 17038                  |
| $D_{\pm}$       | Li <sup>+</sup> diffusion coefficient at 25 C, m <sup>2</sup> ·s <sup>−1</sup> | $3.3 \times 10^{-14}$  | $4 \times 10^{-15}$    |
| $E_{D\pm}$      | Activation energy for Li <sup>+</sup> diffusion, J·mol <sup>−1</sup>           | 30300                  | 25000                  |
| $E_{k\pm}$      | Activation energy for rate constant, J·mol <sup>−1</sup>                       | 35000                  | 17800                  |
| $k_{\pm}$       | (De)intercalation rate constant at 25 C, m·s <sup>−1</sup>                     | $2.12 \times 10^{-10}$ | $1.12 \times 10^{-9}$  |
| $r_{\pm}$       | Electrode particle radius, m                                                   | $5.86 \times 10^{-6}$  | $5.22 \times 10^{-6}$  |
| $\delta_{\pm}$  | Electrode thickness, m                                                         | $8.52 \times 10^{-5}$  | $7.56 \times 10^{-5}$  |
| $\varepsilon_e$ | Electrode porosity                                                             | 0.25                   | 0.335                  |
| $\varepsilon_a$ | Active material volume fraction                                                | 0.75                   | 0.665                  |
| $\sigma_{\pm}$  | Electrode conductivity, S·m <sup>−1</sup>                                      | 215                    | 0.18                   |
| $c_{sol,0}$     | Bulk solvent concentration, mol·m <sup>−3</sup>                                | 2636                   | -                      |
| $\bar{V}_{SEI}$ | SEI partial molar volume, m <sup>3</sup> ·mol <sup>−1</sup>                    | $9.585 \times 10^{-5}$ | -                      |
| $\rho_{SEI}$    | SEI resistivity, $\Omega \cdot m$                                              | $2 \times 10^5$        | -                      |
| $L_{SEI,0}$     | Initial SEI thickness, m                                                       | $5 \times 10^{-9}$     | -                      |
| $E_{sol}$       | Solvent diffusion activation energy, J·mol <sup>−1</sup>                       | 37000                  | -                      |
| $\alpha_{a,Li}$ | Anodic transfer coefficient for Li stripping                                   | 0.35                   | -                      |
| $\alpha_{c,Li}$ | Cathodic transfer coefficient for Li plating                                   | 0.65                   | -                      |
| $E$             | Young's modulus [Pa]                                                           | $1.5 \times 10^{10}$   | $3.75 \times 10^{11}$  |
| $\nu$           | Poisson's ratio                                                                | 0.3                    | 0.2                    |
| $\Omega$        | Partial molar volume [m <sup>3</sup> /mol]                                     | $3.1 \times 10^{-6}$   | $1.25 \times 10^{-5}$  |
| $l_{cr,0}$      | Initial crack length [m]                                                       | $2 \times 10^{-5}$     | $2 \times 10^{-5}$     |
| $w_{cr}$        | Initial crack width [m]                                                        | $1.5 \times 10^{-5}$   | $1.5 \times 10^{-5}$   |
| $\rho_{cr}$     | Number of cracks per unit area [m <sup>−2</sup> ]                              | $3.18 \times 10^{15}$  | $3.18 \times 10^{15}$  |
| $b_{cr}$        | Stress intensity factor correction                                             | 1.12                   | 1.12                   |
| $m_{cr}$        | Paris' law exponential term                                                    | 2.2                    | 2.2                    |
| $\sigma_c$      | Critical stress for particle fracture [Pa]                                     | $6 \times 10^7$        | $3.75 \times 10^8$     |
| $m_2$           | Loss of active material exponential term                                       | 2                      | 2                      |

**Table S2.** Test matrix for lifetime cycling.

| Symmetric | T = 5 °C | T = 15 °C | T = 25 °C                                                                | T = 35 °C | T = 45 °C |
|-----------|----------|-----------|--------------------------------------------------------------------------|-----------|-----------|
| DOD = 30% |          |           | 65%–95% 、 55%–85% 、<br>45%–75% 、 35%–65% 、<br>25%–55%、15%–45%、5%–<br>35% |           |           |
| DOD = 40% |          |           | 55%–95% 、 45%–85% 、<br>35%–75% 、 25%–65% 、<br>15%–55%、5%–45%             |           |           |

---

|     |   |                 |                 |                     |                 |                 |
|-----|---|-----------------|-----------------|---------------------|-----------------|-----------------|
| DOD | = | 45%–95% 、 35%–  | 45%–95% 、 35%–  | 45%–95% 、 35%–85% 、 | 45%–95% 、 35%–  | 45%–95% 、 35%–  |
| 50% |   | 85% 、 25%–75% 、 | 85% 、 25%–75% 、 | 25%–75%、15%–65%、5%– | 85% 、 25%–75% 、 | 85% 、 25%–75% 、 |
|     |   | 15%–65%、5%–55%  | 15%–65%、5%–55%  | 55%                 | 15%–65%、5%–55%  | 15%–65%、5%–55%  |
| DOD | = |                 |                 | 35%–95% 、 25%–85% 、 |                 |                 |
| 60% |   |                 |                 | 15%–75%、5%–65%      |                 |                 |

---

**Disclaimer/Publisher’s Note:** The statements, opinions and data contained in all publications are solely those of the individual author(s) and contributor(s) and not of MDPI and/or the editor(s). MDPI and/or the editor(s) disclaim responsibility for any injury to people or property resulting from any ideas, methods, instructions or products referred to in the content.
